# Supplementary material for: Synthesis, structures and properties of the first series of SrII–MII(M = Cu, Co, Ni and Zn) coordination polymers based on pyridine-2,5-dicarboxylic acid
Source: Royal Society of Chemistry journal article supplement (doi:10.1039/c3ce41975d), 2013-11-25
Supplement: c3ce41975d.pdf [file c3ce41975d.pdf]

## Supporting Information

### Synthesis, structures and properties of the first series of $\text{Sr}^{\text{II}}\text{-M}^{\text{II}}$ (M = Cu, Co, Ni and Zn) coordination polymers based on pyridine-2,5-dicarboxylic acid

Yanmei Chen, Shixiong She, Qian Gao, Dandan Gao, Derong Wang, Yahong Li,\* Wei  
Liu and Wu Li

|                                                                                                                                                          |    |
|----------------------------------------------------------------------------------------------------------------------------------------------------------|----|
| 1. Selected bond lengths [ $\text{\AA}$ ] and angles [ $^{\circ}$ ] and hydrogen bond lengths [ $\text{\AA}$ ] and angles [ $^{\circ}$ ] for<br>1-8..... | 2  |
| 2. IR spectra of complexes 1-8.....                                                                                                                      | 11 |
| 3. PXRD spectra of complexes 1-8.....                                                                                                                    | 14 |
| 4. The excitation spectra of $\text{H}_2\text{pydc}$ , 1, 7, 8.....                                                                                      | 15 |
| 5. The TGA curves of complexes 1-8 and free ligand $\text{H}_2\text{pydc}$ .....                                                                         | 15 |

**Table S1** Selected bond lengths [Å] and angle [°] for complex **1**

|                                                                                                                                                            |            |                     |            |
|------------------------------------------------------------------------------------------------------------------------------------------------------------|------------|---------------------|------------|
| Sr(1)-O(2)#1                                                                                                                                               | 2.4948(16) | Sr(1)-O(5)#4        | 2.7077(17) |
| Sr(1)-O(1)#2                                                                                                                                               | 2.5371(16) | Sr(1)-O(5)          | 2.7259(17) |
| Sr(1)-O(3)#3                                                                                                                                               | 2.5635(17) | Sr(1)-N(1)          | 2.7260(19) |
| Sr(1)-O(1)                                                                                                                                                 | 2.5722(16) |                     |            |
| O(2)#1-Sr(1)-O(1)#2                                                                                                                                        | 103.39(5)  | O(1)#2-Sr(1)-N(1)   | 126.25(5)  |
| O(2)#1-Sr(1)-O(3)#3                                                                                                                                        | 77.59(6)   | O(3)#3-Sr(1)-N(1)   | 74.72(5)   |
| O(1)#2-Sr(1)-O(3)#3                                                                                                                                        | 155.73(6)  | O(1)-Sr(1)-N(1)     | 61.49(5)   |
| O(2)#1-Sr(1)-O(1)                                                                                                                                          | 143.06(6)  | O(5)#4-Sr(1)-N(1)   | 141.32(5)  |
| O(1)#2-Sr(1)-O(1)                                                                                                                                          | 67.16(6)   | O(5)-Sr(1)-N(1)     | 88.42(5)   |
| O(3)#3-Sr(1)-O(1)                                                                                                                                          | 126.04(6)  | O(2)#1-Sr(1)-O(4)#5 | 73.30(5)   |
| O(2)#1-Sr(1)-O(5)#4                                                                                                                                        | 81.61(5)   | O(1)#2-Sr(1)-O(4)#5 | 72.52(5)   |
| O(1)#2-Sr(1)-O(5)#4                                                                                                                                        | 85.21(5)   | O(3)#3-Sr(1)-O(4)#5 | 129.37(5)  |
| O(3)#3-Sr(1)-O(5)#4                                                                                                                                        | 70.84(5)   | O(1)-Sr(1)-O(4)#5   | 69.81(5)   |
| O(1)-Sr(1)-O(5)#4                                                                                                                                          | 130.15(5)  | O(5)#4-Sr(1)-O(4)#5 | 140.99(5)  |
| O(2)#1-Sr(1)-O(5)                                                                                                                                          | 146.03(5)  | O(5)-Sr(1)-O(4)#5   | 140.56(5)  |
| O(1)#2-Sr(1)-O(5)                                                                                                                                          | 89.30(5)   | N(1)-Sr(1)-O(4)#5   | 75.99(5)   |
| O(3)#3-Sr(1)-O(5)                                                                                                                                          | 78.33(6)   | Sr(1)#4-O(5)-Sr(1)  | 111.99(6)  |
| O(1)-Sr(1)-O(5)                                                                                                                                            | 70.90(5)   | O(2)#1-Sr(1)-N(1)   | 107.77(6)  |
| O(5)#4-Sr(1)-O(5)                                                                                                                                          | 68.01(6)   |                     |            |
| Symmetry transformations used to generate equivalent atoms:<br>#1 x,y+1,z; #2 -x+1,-y+1,-z+1; #3 -x,-y+1,-z; #4 -x,-y+1,-z+1; #5 -x+1,-y+1,-z; #6 x,y-1,z. |            |                     |            |

**Table S2** Hydrogen bonds for complex **1** [Å and °]

| D-H...A                                                                                                                                                                                         | d(D-H) | d(H...A) | d(D...A) | <(DHA) |
|-------------------------------------------------------------------------------------------------------------------------------------------------------------------------------------------------|--------|----------|----------|--------|
| O(5)-H(5A)...O(4)#7                                                                                                                                                                             | 0.85   | 1.89     | 2.735(2) | 173.3  |
| O(5)-H(5A)...O(3)#7                                                                                                                                                                             | 0.85   | 2.53     | 3.057(2) | 121.5  |
| O(5)-H(5B)...O(4)#8                                                                                                                                                                             | 0.85   | 2.39     | 3.113(2) | 142.7  |
| O(5)-H(5B)...O(2)#9                                                                                                                                                                             | 0.85   | 2.53     | 3.099(2) | 124.7  |
| Symmetry transformations used to generate equivalent atoms:<br>#1 x,y+1,z; #2 -x+1,-y+1,-z+1; #3 -x,-y+1,-z; #4 -x,-y+1,-z+1; #5 -x+1,-y+1,-z; #6 x,y-1,z; #7 x,y,z+1; #8 -x,-y,-z; #9 x-1,y,z. |        |          |          |        |

**Table S3** Selected bond lengths [Å] and angle [°] for complex **2**

|                     |            |                     |            |
|---------------------|------------|---------------------|------------|
| Cu(1)-O(5)#1        | 1.9479(14) | Sr(2)-O(11)         | 2.5579(17) |
| Cu(1)-N(2)#1        | 1.9791(16) | Sr(2)-O(12)         | 2.6244(18) |
| Cu(1)-O(7)#2        | 2.3698(17) | Sr(2)-O(4)#3        | 2.6725(15) |
| Sr(2)-O(8)          | 2.5095(15) | Sr(2)-O(3)#3        | 2.6828(16) |
| Sr(2)-O(10)         | 2.5469(18) | Sr(2)-O(9)          | 2.7394(18) |
| Sr(2)-O(3)          | 2.5485(14) |                     |            |
| O(1)-Cu(1)-O(5)#1   | 172.71(7)  | O(4)#3-Sr(2)-O(3)#3 | 48.72(4)   |
| O(1)-Cu(1)-N(1)     | 83.64(6)   | O(8)-Sr(2)-O(9)     | 72.30(5)   |
| O(5)#1-Cu(1)-N(1)   | 96.48(6)   | O(10)-Sr(2)-O(9)    | 77.77(6)   |
| O(1)-Cu(1)-N(2)#1   | 95.39(7)   | O(3)-Sr(2)-O(9)     | 77.05(5)   |
| O(5)#1-Cu(1)-N(2)#1 | 83.47(6)   | O(11)-Sr(2)-O(9)    | 138.94(6)  |
| N(1)-Cu(1)-N(2)#1   | 172.02(7)  | O(12)-Sr(2)-O(9)    | 146.08(5)  |
| O(1)-Cu(1)-O(7)#2   | 100.15(6)  | O(4)#3-Sr(2)-O(9)   | 103.70(5)  |
| O(5)#1-Cu(1)-O(7)#2 | 87.14(6)   | O(3)#3-Sr(2)-O(9)   | 74.16(5)   |
| N(1)-Cu(1)-O(7)#2   | 91.41(6)   | O(8)-Sr(2)-C(7)#3   | 158.90(5)  |
| N(2)#1-Cu(1)-O(7)#2 | 96.55(6)   | O(10)-Sr(2)-C(7)#3  | 82.65(6)   |
| O(8)-Sr(2)-O(10)    | 91.14(6)   | O(3)-Sr(2)-C(7)#3   | 95.80(5)   |
| O(8)-Sr(2)-O(3)     | 81.31(5)   | O(11)-Sr(2)-C(7)#3  | 123.50(6)  |
| O(10)-Sr(2)-O(3)    | 154.83(6)  | O(12)-Sr(2)-C(7)#3  | 87.43(6)   |
| O(8)-Sr(2)-O(11)    | 74.55(6)   | O(4)#3-Sr(2)-C(7)#3 | 24.31(4)   |
| O(10)-Sr(2)-O(11)   | 79.37(6)   | O(3)#3-Sr(2)-C(7)#3 | 24.76(4)   |
| O(3)-Sr(2)-O(11)    | 120.85(5)  | O(9)-Sr(2)-C(7)#3   | 86.66(5)   |
| O(8)-Sr(2)-O(12)    | 110.85(6)  | O(8)-Sr(2)-Sr(2)#3  | 113.75(4)  |
| O(10)-Sr(2)-O(12)   | 134.33(6)  | O(10)-Sr(2)-Sr(2)#3 | 131.53(5)  |

|                                                                                                                          |           |                      |           |
|--------------------------------------------------------------------------------------------------------------------------|-----------|----------------------|-----------|
| O(3)-Sr(2)-O(12)                                                                                                         | 70.38(5)  | O(3)-Sr(2)-Sr(2)#3   | 37.24(3)  |
| O(11)-Sr(2)-O(12)                                                                                                        | 69.54(6)  | O(11)-Sr(2)-Sr(2)#3  | 145.37(5) |
| O(8)-Sr(2)-O(4)#3                                                                                                        | 161.21(5) | O(12)-Sr(2)-Sr(2)#3  | 76.34(4)  |
| O(10)-Sr(2)-O(4)#3                                                                                                       | 70.11(6)  | O(4)#3-Sr(2)-Sr(2)#3 | 81.21(4)  |
| O(3)-Sr(2)-O(4)#3                                                                                                        | 116.18(5) | O(3)#3-Sr(2)-Sr(2)#3 | 35.09(3)  |
| O(11)-Sr(2)-O(4)#3                                                                                                       | 99.90(6)  | O(9)-Sr(2)-Sr(2)#3   | 72.03(4)  |
| O(12)-Sr(2)-O(4)#3                                                                                                       | 82.96(6)  | Sr(2)-O(3)-Sr(2)#3   | 107.68(5) |
| O(8)-Sr(2)-O(3)#3                                                                                                        | 141.04(5) | O(11)-Sr(2)-O(3)#3   | 143.95(6) |
| O(10)-Sr(2)-O(3)#3                                                                                                       | 100.62(5) | O(12)-Sr(2)-O(3)#3   | 86.97(6)  |
| O(3)-Sr(2)-O(3)#3                                                                                                        | 72.32(5)  |                      |           |
| Symmetry transformations used to generate equivalent atoms:<br>#1 -x,-y+1,-z; #2 x-1,y,z; #3 -x+1,-y+2,-z+1; #4 x+1,y,z. |           |                      |           |

**Table S4** Hydrogen bonds for complex **2** [Å and °]

| D-H...A                                                                                                                                                           | d(D-H) | d(H...A) | d(D...A) | <(DHA) |
|-------------------------------------------------------------------------------------------------------------------------------------------------------------------|--------|----------|----------|--------|
| O(9)-H(9A)..O(12)#1                                                                                                                                               | 0.85   | 2.29     | 3.057(2) | 151    |
| O(9)-H(9B)..O(7)                                                                                                                                                  | 0.85   | 1.97     | 2.800(2) | 165    |
| O(10)-H(10A)..O(6)#5                                                                                                                                              | 0.85   | 2.03     | 2.879(2) | 174    |
| O(10)-H(10B)..O(2)#6                                                                                                                                              | 0.85   | 2.01     | 2.840(2) | 166    |
| O(11)-H(11A)..O(5)#2                                                                                                                                              | 0.85   | 2.40     | 3.230(2) | 165    |
| O(11)-H(11A)..O(6)#2                                                                                                                                              | 0.85   | 2.32     | 3.015(2) | 139    |
| O(11)-H(11B)..O(6)#7                                                                                                                                              | 0.85   | 1.99     | 2.811(2) | 162    |
| O(12)-H(12A)..O(9)#3                                                                                                                                              | 0.85   | 1.97     | 2.815(2) | 175    |
| O(12)-H(12B)..O(2)#7                                                                                                                                              | 0.85   | 1.94     | 2.793(2) | 173    |
| C(10)-H(10)..O(4)#4                                                                                                                                               | 0.93   | 2.50     | 3.193(2) | 132    |
| Symmetry transformations used to generate equivalent atoms: #1 1+x,y,z; #2 -x,1-y,-z;<br>#3 1-x,2-y,1-z; #4 1-x,1-y,1-z; #5 1-x,1-y,-z; #6 1+x,1+y,z; #7 x,1+y,z; |        |          |          |        |

**Table S5** Selected bond lengths [Å] and angle [°] for complex **3**

|                     |            |                    |            |
|---------------------|------------|--------------------|------------|
| Sr(1)-O(3)#1        | 2.4768(18) | Sr(1)-O(5)         | 2.7071(17) |
| Sr(1)-O(11B)        | 2.508(15)  | Sr(1)-O(6)         | 2.726(2)   |
| Sr(1)-O(9B)         | 2.571(7)   | Co(1)-O(13)        | 2.051(2)   |
| Sr(1)-O(2)#2        | 2.5775(19) | Co(1)-O(14)        | 2.051(2)   |
| Sr(1)-O(9)          | 2.604(7)   | Co(1)-O(5)         | 2.0731(17) |
| Sr(1)-O(10)         | 2.610(3)   | Co(1)-O(1)         | 2.0806(18) |
| Sr(1)-O(12)         | 2.619(2)   | Co(1)-N(2)         | 2.151(2)   |
| Sr(1)-O(11)         | 2.706(19)  | Co(1)-N(1)         | 2.155(2)   |
| O(3)#1-Sr(1)-O(11B) | 98.3(4)    | O(10)-Sr(1)-O(12)  | 69.87(8)   |
| O(3)#1-Sr(1)-O(9B)  | 159.44(16) | O(3)#1-Sr(1)-O(11) | 107.7(4)   |
| O(11B)-Sr(1)-O(9B)  | 91.3(4)    | O(11B)-Sr(1)-O(11) | 9.5(7)     |
| O(3)#1-Sr(1)-O(2)#2 | 89.82(7)   | O(9B)-Sr(1)-O(11)  | 82.0(4)    |
| O(11B)-Sr(1)-O(2)#2 | 68.9(4)    | O(2)#2-Sr(1)-O(11) | 68.5(4)    |
| O(9B)-Sr(1)-O(2)#2  | 76.7(2)    | O(9)-Sr(1)-O(11)   | 95.6(4)    |
| O(3)#1-Sr(1)-O(9)   | 155.0(2)   | O(10)-Sr(1)-O(11)  | 139.6(4)   |
| O(11B)-Sr(1)-O(9)   | 105.1(4)   | O(12)-Sr(1)-O(11)  | 146.9(4)   |
| O(9B)-Sr(1)-O(9)    | 16.67(17)  | O(3)#1-Sr(1)-O(5)  | 127.45(6)  |
| O(2)#2-Sr(1)-O(9)   | 90.6(3)    | O(11B)-Sr(1)-O(5)  | 72.8(4)    |
| O(3)#1-Sr(1)-O(10)  | 84.94(9)   | O(9B)-Sr(1)-O(5)   | 72.76(15)  |
| O(11B)-Sr(1)-O(10)  | 142.1(4)   | O(2)#2-Sr(1)-O(5)  | 129.67(6)  |
| O(9B)-Sr(1)-O(10)   | 76.4(2)    | O(9)-Sr(1)-O(5)    | 69.14(19)  |
| O(2)#2-Sr(1)-O(10)  | 73.47(8)   | O(10)-Sr(1)-O(5)   | 133.44(8)  |
| O(9)-Sr(1)-O(10)    | 71.29(19)  | O(12)-Sr(1)-O(5)   | 79.36(6)   |
| O(3)#1-Sr(1)-O(12)  | 85.78(7)   | O(11)-Sr(1)-O(5)   | 68.4(4)    |
| O(11B)-Sr(1)-O(12)  | 147.8(4)   | O(3)#1-Sr(1)-O(6)  | 79.61(6)   |
| O(9B)-Sr(1)-O(12)   | 95.7(3)    | O(11B)-Sr(1)-O(6)  | 76.2(4)    |
| O(2)#2-Sr(1)-O(12)  | 143.32(8)  | O(9B)-Sr(1)-O(6)   | 120.51(16) |
| O(9)-Sr(1)-O(12)    | 79.0(3)    | O(2)#2-Sr(1)-O(6)  | 141.49(8)  |
| O(5)-Co(1)-O(1)     | 92.54(7)   | O(9)-Sr(1)-O(6)    | 114.1(2)   |
| O(13)-Co(1)-N(2)    | 87.57(8)   | O(10)-Sr(1)-O(6)   | 140.79(8)  |

|                                                                                                              |           |                   |            |
|--------------------------------------------------------------------------------------------------------------|-----------|-------------------|------------|
| O(14)-Co(1)-N(2)                                                                                             | 86.95(10) | O(12)-Sr(1)-O(6)  | 73.21(8)   |
| O(5)-Co(1)-N(2)                                                                                              | 77.50(7)  | O(11)-Sr(1)-O(6)  | 79.6(4)    |
| O(1)-Co(1)-N(2)                                                                                              | 169.95(7) | O(5)-Sr(1)-O(6)   | 47.85(5)   |
| O(13)-Co(1)-N(1)                                                                                             | 85.79(8)  | O(13)-Co(1)-O(14) | 172.00(12) |
| O(14)-Co(1)-N(1)                                                                                             | 90.92(9)  | O(13)-Co(1)-O(5)  | 91.25(8)   |
| O(5)-Co(1)-N(1)                                                                                              | 169.40(8) | O(14)-Co(1)-O(5)  | 93.25(10)  |
| O(1)-Co(1)-N(1)                                                                                              | 77.55(7)  | O(13)-Co(1)-O(1)  | 94.03(8)   |
| N(2)-Co(1)-N(1)                                                                                              | 112.48(8) | O(14)-Co(1)-O(1)  | 92.37(10)  |
| Symmetry transformations used to generate equivalent atoms:<br>#1 x,y,z+1    #2 -x+1,-y+1,-z+1    #3 x,y,z-1 |           |                   |            |

**Table S6** Hydrogen bonds for complex **3** [Å and °]

| D-H...A                                                                                                                                                                                                        | d(D-H)    | d(H...A)  | d(D...A)  | <(DHA) |
|----------------------------------------------------------------------------------------------------------------------------------------------------------------------------------------------------------------|-----------|-----------|-----------|--------|
| O(9)-H(9A)...O(15)                                                                                                                                                                                             | 0.822(10) | 2.03(4)   | 2.779(12) | 152(8) |
| O(9)-H(9B)...O(1)                                                                                                                                                                                              | 0.821(10) | 2.33(8)   | 2.844(8)  | 121(8) |
| O(9B)-H(9C)...O(1)#2                                                                                                                                                                                           | 0.822(10) | 2.250(19) | 3.006(10) | 153(2) |
| O(9B)-H(9D)...O(1)                                                                                                                                                                                             | 0.823(10) | 1.942(16) | 2.761(7)  | 173(7) |
| O(10)-H(10A)...O(7)#4                                                                                                                                                                                          | 0.819(10) | 1.977(14) | 2.730(3)  | 153(2) |
| O(10)-H(10B)...O(15)                                                                                                                                                                                           | 0.816(10) | 2.45(2)   | 3.250(14) | 167(4) |
| O(10)-H(10B)...O(15B)                                                                                                                                                                                          | 0.816(10) | 1.75(2)   | 2.539(17) | 161(4) |
| O(11)-H(11A)...O(12)#5                                                                                                                                                                                         | 0.821(10) | 2.35(3)   | 2.94(2)   | 129(4) |
| O(11)-H(11B)...O(15)#2                                                                                                                                                                                         | 0.824(10) | 2.27(3)   | 2.94(2)   | 139(3) |
| O(11B)-H(11C)...O(12)#5                                                                                                                                                                                        | 0.821(10) | 2.34(3)   | 2.949(16) | 131(4) |
| O(11B)-H(11D)...O(15B)#5                                                                                                                                                                                       | 0.821(10) | 2.52(6)   | 3.25(3)   | 148(9) |
| O(11B)-H(11D)...O(10)#5                                                                                                                                                                                        | 0.821(10) | 2.55(3)   | 3.187(16) | 135(3) |
| O(12)-H(12A)...O(4)#6                                                                                                                                                                                          | 0.820(10) | 1.959(13) | 2.769(3)  | 169(4) |
| O(12)-H(12B)...O(6)#7                                                                                                                                                                                          | 0.823(10) | 1.971(15) | 2.773(3)  | 164(4) |
| O(13)-H(13C)...O(4)#6                                                                                                                                                                                          | 0.821(10) | 1.922(12) | 2.736(3)  | 171(3) |
| O(13)-H(13D)...O(8)#6                                                                                                                                                                                          | 0.823(10) | 1.838(11) | 2.659(3)  | 175(3) |
| O(14)-H(14C)...O(4)#8                                                                                                                                                                                          | 0.812(10) | 1.975(16) | 2.767(3)  | 165(4) |
| O(14)-H(14D)...O(8)#8                                                                                                                                                                                          | 0.813(10) | 1.893(15) | 2.693(3)  | 167(5) |
| O(15)-H(15A)...O(15)#9                                                                                                                                                                                         | 0.82      | 1.95      | 2.64(2)   | 141.0  |
| O(15)-H(15A)...O(9)#9                                                                                                                                                                                          | 0.82      | 1.98      | 2.514(17) | 122.2  |
| O(15)-H(15B)...O(11)#2                                                                                                                                                                                         | 0.82      | 2.17      | 2.94(2)   | 156.8  |
| O(15B)-H(15C)...O(9B)#9                                                                                                                                                                                        | 0.82      | 2.03      | 2.754(19) | 147.0  |
| O(15B)-H(15D)...O(8)#4                                                                                                                                                                                         | 0.82      | 2.21      | 2.837(19) | 132.9  |
| C(12)-H(12)...O(8)                                                                                                                                                                                             | 0.93      | 2.50      | 2.821(3)  | 100.2  |
| Symmetry transformations used to generate equivalent atoms:<br>#1 x,y,z+1    #2 -x+1,-y+1,-z+1    #3 x,y,z-1<br>#4 x,y+1,z+1    #5 x+1,y,z    #6 -x,-y,-z    #7 -x,-y,-z+1<br>#8 -x+1,-y,-z    #9 -x,-y+1,-z+1 |           |           |           |        |

**Table S7** Selected bond lengths [Å] and angle [°] for complex **4**

|                     |            |                     |            |
|---------------------|------------|---------------------|------------|
| Sr(1)-O(4)#1        | 2.466(2)   | Sr(1)-O(5)          | 2.833(2)   |
| Sr(1)-O(4)#2        | 2.466(2)   | Ni(1)-N(1)          | 2.028(2)   |
| Sr(1)-O(2)#3        | 2.5652(19) | Ni(1)-N(1)#6        | 2.028(2)   |
| Sr(1)-O(2)          | 2.5652(19) | Ni(1)-O(1)          | 2.0434(18) |
| Sr(1)-O(5)#4        | 2.622(2)   | Ni(1)-O(1)#6        | 2.0434(18) |
| Sr(1)-O(5)#5        | 2.622(2)   | Ni(1)-O(6)#6        | 2.096(2)   |
| Sr(1)-O(5)#3        | 2.833(2)   | Ni(1)-O(6)          | 2.096(2)   |
| O(4)#1-Sr(1)-O(4)#2 | 77.82(14)  | N(1)-Ni(1)-O(1)     | 80.33(8)   |
| O(4)#1-Sr(1)-O(2)#3 | 129.00(7)  | N(1)#6-Ni(1)-O(1)   | 99.67(8)   |
| O(4)#2-Sr(1)-O(2)#3 | 84.10(8)   | N(1)-Ni(1)-O(1)#6   | 99.67(8)   |
| O(4)#1-Sr(1)-O(2)   | 84.10(8)   | N(1)#6-Ni(1)-O(1)#6 | 80.33(8)   |
| O(4)#2-Sr(1)-O(2)   | 129.00(7)  | O(1)-Ni(1)-O(1)#6   | 180.00(8)  |
| O(2)#3-Sr(1)-O(2)   | 140.46(10) | N(1)-Ni(1)-O(6)#6   | 88.77(9)   |
| O(4)#1-Sr(1)-O(5)#4 | 154.88(7)  | N(1)#6-Ni(1)-O(6)#6 | 91.23(9)   |
| O(4)#2-Sr(1)-O(5)#4 | 102.54(8)  | O(1)-Ni(1)-O(6)#6   | 90.11(8)   |
| O(2)#3-Sr(1)-O(5)#4 | 75.51(6)   | O(1)#6-Ni(1)-O(6)#6 | 89.89(8)   |
| O(2)-Sr(1)-O(5)#4   | 76.25(7)   | N(1)-Ni(1)-O(6)     | 91.23(9)   |

|                     |           |                    |            |
|---------------------|-----------|--------------------|------------|
| O(4)#1-Sr(1)-O(5)#5 | 102.54(8) | N(1)#6-Ni(1)-O(6)  | 88.77(9)   |
| O(4)#2-Sr(1)-O(5)#5 | 154.88(7) | O(1)-Ni(1)-O(6)    | 89.89(8)   |
| O(2)#3-Sr(1)-O(5)#5 | 76.25(7)  | O(1)#6-Ni(1)-O(6)  | 90.11(8)   |
| O(2)-Sr(1)-O(5)#5   | 75.51(6)  | O(6)#6-Ni(1)-O(6)  | 180.00(9)  |
| O(5)#4-Sr(1)-O(5)#5 | 87.67(9)  | Sr(1)#4-O(5)-Sr(1) | 111.39(7)  |
| O(4)#1-Sr(1)-O(5)#3 | 62.43(7)  | O(4)#2-Sr(1)-O(5)  | 62.43(7)   |
| O(4)#2-Sr(1)-O(5)#3 | 90.28(7)  | O(2)#3-Sr(1)-O(5)  | 122.20(6)  |
| O(2)#3-Sr(1)-O(5)#3 | 70.50(6)  | O(2)-Sr(1)-O(5)    | 70.50(6)   |
| O(2)-Sr(1)-O(5)#3   | 122.20(6) | O(5)#4-Sr(1)-O(5)  | 68.61(7)   |
| O(5)#4-Sr(1)-O(5)#3 | 142.10(6) | O(5)#5-Sr(1)-O(5)  | 142.10(6)  |
| O(5)#5-Sr(1)-O(5)#3 | 68.61(7)  | O(5)#3-Sr(1)-O(5)  | 145.78(8)  |
| O(4)#1-Sr(1)-O(5)   | 90.28(7)  | N(1)-Ni(1)-N(1)#6  | 180.00(11) |

Symmetry transformations used to generate equivalent atoms:  
 #1 -x+1/2,y-1/2,-z+1/2; #2 x+1/2,y-1/2,z; #3 -x+1,y,-z+1/2; #4 -x+1,-y,-z+1;  
 #5 x,-y,z-1/2; #6 -x+1/2,-y+1/2,-z; #7 x-1/2,y+1/2,z.

**Table S8** Hydrogen bonds for complex **4** [Å and °]

| D-H...A              | d(D-H) | d(H...A) | d(D...A) | <(DHA) |
|----------------------|--------|----------|----------|--------|
| O(5)-H(5B)...O(1)#9  | 0.85   | 1.90     | 2.723(3) | 162.6  |
| O(5)-H(5A)...O(4)#2  | 0.85   | 2.16     | 2.764(3) | 127.6  |
| O(5)-H(5A)...O(3)#2  | 0.85   | 2.53     | 3.375(3) | 174.4  |
| O(6)-H(6B)...O(3)#10 | 0.85   | 1.89     | 2.736(3) | 176.6  |
| O(6)-H(6A)...O(7)#10 | 0.85   | 1.92     | 2.761(4) | 170.4  |
| O(7)-H(7A)...O(3)#11 | 0.85   | 1.88     | 2.728(4) | 178.3  |
| O(7)-H(7B)...O(8)#12 | 0.85   | 2.27     | 2.898(4) | 131.3  |
| O(8)-H(8)...O(7)     | 0.87   | 1.90     | 2.727(6) | 158.0  |
| C(2)-H(2)...O(1)#9   | 0.93   | 2.59     | 3.504(3) | 168.4  |
| C(5)-H(5)...O(4)     | 0.93   | 2.39     | 2.721(3) | 100.6  |

Symmetry transformations used to generate equivalent atoms:  
 #1 -x+1/2,y-1/2,-z+1/2; #2 x+1/2,y-1/2,z; #3 -x+1,y,-z+1/2; #4 -x+1,-y,-z+1;  
 #5 x,-y,z-1/2; #6 -x+1/2,-y+1/2,-z; #7 x-1/2,y+1/2,z; #8 -x+1,-y,-z; #9 x,-y,z+1/2;  
 #10 -x+1/2,-y+1/2,-z+1; #11 -x,y,-z+3/2; #12 -x,-y,-z+2.

**Table S9** Selected bond lengths [Å] and angle [°] for complex **5**

|                     |            |                     |            |
|---------------------|------------|---------------------|------------|
| Sr(1)-O(7)#1        | 2.531(3)   | Sr(1)-O(6)#3        | 2.694(3)   |
| Sr(1)-O(7)          | 2.531(3)   | Sr(1)-O(9)#4        | 2.858(5)   |
| Sr(1)-O(8)          | 2.582(4)   | Ni(1)-O(1)#5        | 2.019(3)   |
| Sr(1)-O(9)          | 2.649(4)   | Ni(1)-O(1)#5        | 2.019(3)   |
| Sr(1)-O(6)          | 2.678(3)   | Ni(1)-N(1)#5        | 2.023(3)   |
| Sr(1)-O(6)#1        | 2.678(3)   | Ni(1)-O(5)#5        | 2.083(3)   |
| Sr(1)-O(6)#2        | 2.694(3)   | Ni(1)-O(5)          | 2.083(3)   |
| O(7)#1-Sr(1)-O(7)   | 118.41(15) | O(7)-Sr(1)-O(9)#4   | 120.79(8)  |
| O(7)#1-Sr(1)-O(8)   | 70.58(8)   | O(8)-Sr(1)-O(9)#4   | 130.01(15) |
| O(7)-Sr(1)-O(8)     | 70.58(8)   | O(9)-Sr(1)-O(9)#4   | 124.81(12) |
| O(7)#1-Sr(1)-O(9)   | 73.23(9)   | O(6)-Sr(1)-O(9)#4   | 62.73(9)   |
| O(7)-Sr(1)-O(9)     | 73.23(9)   | O(6)#1-Sr(1)-O(9)#4 | 62.73(9)   |
| O(8)-Sr(1)-O(9)     | 105.18(14) | O(6)#2-Sr(1)-O(9)#4 | 69.88(9)   |
| O(7)#1-Sr(1)-O(6)   | 136.37(10) | O(6)#3-Sr(1)-O(9)#4 | 69.88(9)   |
| O(7)-Sr(1)-O(6)     | 74.89(10)  | O(1)#5-Ni(1)-O(1)#5 | 0.00(16)   |
| O(8)-Sr(1)-O(6)     | 76.94(11)  | O(1)#5-Ni(1)-O(1)   | 180.00(15) |
| O(9)-Sr(1)-O(6)     | 145.03(6)  | O(1)#5-Ni(1)-O(1)   | 180.00(15) |
| O(7)#1-Sr(1)-O(6)#1 | 74.89(10)  | O(1)#5-Ni(1)-N(1)#5 | 80.72(12)  |
| O(7)-Sr(1)-O(6)#1   | 136.37(10) | O(1)#5-Ni(1)-N(1)#5 | 80.72(12)  |
| O(8)-Sr(1)-O(6)#1   | 76.94(11)  | O(1)-Ni(1)-N(1)#5   | 99.28(12)  |
| O(9)-Sr(1)-O(6)#1   | 145.03(6)  | O(1)#5-Ni(1)-N(1)   | 99.28(12)  |
| O(6)-Sr(1)-O(6)#1   | 69.92(12)  | O(1)#5-Ni(1)-N(1)   | 99.28(12)  |
| O(7)#1-Sr(1)-O(6)#2 | 71.95(9)   | O(1)-Ni(1)-N(1)     | 80.72(12)  |
| O(7)-Sr(1)-O(6)#2   | 131.97(10) | N(1)#5-Ni(1)-N(1)   | 180.00(19) |
| O(8)-Sr(1)-O(6)#2   | 142.46(7)  | O(1)#5-Ni(1)-O(5)#5 | 88.45(13)  |
| O(9)-Sr(1)-O(6)#2   | 65.38(10)  | O(1)#5-Ni(1)-O(5)#5 | 88.45(13)  |

|                                                                                                                                                               |            |                     |            |
|---------------------------------------------------------------------------------------------------------------------------------------------------------------|------------|---------------------|------------|
| O(6)-Sr(1)-O(6)#2                                                                                                                                             | 132.53(5)  | O(1)-Ni(1)-O(5)#5   | 91.55(13)  |
| O(6)#1-Sr(1)-O(6)#2                                                                                                                                           | 91.33(8)   | N(1)#5-Ni(1)-O(5)#5 | 86.27(12)  |
| O(7)#1-Sr(1)-O(6)#3                                                                                                                                           | 131.97(10) | N(1)-Ni(1)-O(5)#5   | 93.73(12)  |
| O(7)-Sr(1)-O(6)#3                                                                                                                                             | 71.95(9)   | O(1)#5-Ni(1)-O(5)   | 91.55(13)  |
| O(8)-Sr(1)-O(6)#3                                                                                                                                             | 142.46(7)  | O(1)#5-Ni(1)-O(5)   | 91.55(13)  |
| O(9)-Sr(1)-O(6)#3                                                                                                                                             | 65.38(10)  | O(1)-Ni(1)-O(5)     | 88.45(13)  |
| O(6)-Sr(1)-O(6)#3                                                                                                                                             | 91.33(8)   | N(1)#5-Ni(1)-O(5)   | 93.73(12)  |
| O(6)#1-Sr(1)-O(6)#3                                                                                                                                           | 132.53(5)  | N(1)-Ni(1)-O(5)     | 86.27(12)  |
| O(6)#2-Sr(1)-O(6)#3                                                                                                                                           | 69.45(12)  | O(5)#5-Ni(1)-O(5)   | 180.00(16) |
| O(7)#1-Sr(1)-O(9)#4                                                                                                                                           | 120.79(8)  | Sr(1)-O(6)-Sr(1)#4  | 103.01(10) |
| Sr(1)-O(9)-Sr(1)#3                                                                                                                                            | 99.48(13)  |                     |            |
| Symmetry transformations used to generate equivalent atoms:<br>#1 x,-y+1/2,z; #2 x-1/2,-y+1/2,-z+1/2; #3 x-1/2,y,-z+1/2; #4 x+1/2,y,-z+1/2;<br>-x,-y+1,-z. #5 |            |                     |            |

**Table S10** Hydrogen bonds for complex **5** [ $\text{\AA}$  and  $^\circ$ ]

| D-H...A                                                                                                                                                                                         | d(D-H) | d(H...A) | d(D...A) | <(DHA) |
|-------------------------------------------------------------------------------------------------------------------------------------------------------------------------------------------------|--------|----------|----------|--------|
| O(5)-H(5A)...O(3)#6                                                                                                                                                                             | 0.85   | 1.86     | 2.713(4) | 177.4  |
| O(5)-H(5B)...O(3)#4                                                                                                                                                                             | 0.85   | 1.94     | 2.748(4) | 159.7  |
| O(6)-H(6A)...O(10)                                                                                                                                                                              | 0.85   | 1.93     | 2.764(5) | 168.4  |
| O(6)-H(6B)...O(4)                                                                                                                                                                               | 0.85   | 1.92     | 2.751(4) | 167.2  |
| O(7)-H(7A)...O(1)#5                                                                                                                                                                             | 0.85   | 1.98     | 2.830(4) | 176.6  |
| O(7)-H(7B)...O(4)#3                                                                                                                                                                             | 0.85   | 1.92     | 2.737(4) | 159.9  |
| O(8)-H(8A)...O(2)#5                                                                                                                                                                             | 0.85   | 2.00     | 2.838(5) | 168.2  |
| O(9)-H(9A)...O(10)#7                                                                                                                                                                            | 0.85   | 1.93     | 2.766(4) | 168.5  |
| O(10)-H(10A)...O(3)#4                                                                                                                                                                           | 0.85   | 2.20     | 3.035(5) | 169.6  |
| O(10)-H(10A)...O(4)#4                                                                                                                                                                           | 0.85   | 2.44     | 2.968(5) | 120.5  |
| O(10)-H(10B)...O(2)#5                                                                                                                                                                           | 0.85   | 2.08     | 2.925(5) | 172.6  |
| O(10)-H(10B)...O(1)#5                                                                                                                                                                           | 0.85   | 2.60     | 3.123(5) | 121.2  |
| O(11)-H(11B)...O(12)                                                                                                                                                                            | 0.85   | 2.29     | 3.14(5)  | 172.2  |
| C(5)-H(5)...O(4)                                                                                                                                                                                | 0.93   | 2.42     | 2.741(5) | 100.0  |
| Symmetry transformations used to generate equivalent atoms:<br>#1 x,-y+1/2,z; #2 x-1/2,-y+1/2,-z+1/2; #3 x-1/2,y,-z+1/2; #4 x+1/2,y,-z+1/2; #5<br>-x,-y+1,-z; #6 -x+1/2,-y+1,z-1/2; #7 x-1,y,z. |        |          |          |        |

**Table S11** Selected bond lengths [ $\text{\AA}$ ] and angle [ $^\circ$ ] for complex **6**

|                     |            |                      |            |
|---------------------|------------|----------------------|------------|
| Sr(1)-O(2)          | 2.5088(19) | Sr(2)-O(20)          | 2.603(4)   |
| Sr(1)-O(16)         | 2.569(3)   | Sr(2)-O(5)           | 2.6216(18) |
| Sr(1)-O(14)         | 2.581(2)   | Sr(2)-O(10)#1        | 2.643(2)   |
| Sr(1)-O(13)         | 2.586(3)   | Sr(2)-O(6)           | 2.720(2)   |
| Sr(1)-O(11)#1       | 2.587(2)   | Sr(2)-O(19)          | 2.856(3)   |
| Sr(1)-O(15)         | 2.589(3)   | Ni(1)-O(5)           | 2.0479(18) |
| Sr(1)-O(12)#2       | 2.6271(19) | Ni(1)-N(1)           | 2.054(2)   |
| Sr(1)-O(11)#2       | 2.733(2)   | Ni(1)-O(1)           | 2.0547(18) |
| Sr(2)-O(17)         | 2.492(3)   | Ni(1)-N(3)           | 2.059(2)   |
| Sr(2)-O(20B)        | 2.526(9)   | Ni(1)-O(9)           | 2.0714(19) |
| Sr(2)-O(7)#4        | 2.526(2)   | Ni(1)-N(2)           | 2.084(2)   |
| Sr(2)-O(18)         | 2.586(3)   |                      |            |
| O(2)-Sr(1)-O(16)    | 105.65(8)  | O(7)#4-Sr(2)-O(5)    | 84.92(7)   |
| O(2)-Sr(1)-O(14)    | 74.16(8)   | O(18)-Sr(2)-O(5)     | 149.65(8)  |
| O(16)-Sr(1)-O(14)   | 73.75(10)  | O(20)-Sr(2)-O(5)     | 137.13(11) |
| O(2)-Sr(1)-O(13)    | 94.23(8)   | O(17)-Sr(2)-O(10)#1  | 152.67(8)  |
| O(16)-Sr(1)-O(13)   | 135.61(10) | O(20B)-Sr(2)-O(10)#1 | 100.4(4)   |
| O(14)-Sr(1)-O(13)   | 74.26(9)   | O(7)#4-Sr(2)-O(10)#1 | 80.42(7)   |
| O(2)-Sr(1)-O(11)#1  | 86.36(7)   | O(18)-Sr(2)-O(10)#1  | 72.64(9)   |
| O(16)-Sr(1)-O(11)#1 | 143.12(10) | O(20)-Sr(2)-O(10)#1  | 119.83(15) |
| O(14)-Sr(1)-O(11)#1 | 142.73(7)  | O(5)-Sr(2)-O(10)#1   | 82.24(6)   |
| O(13)-Sr(1)-O(11)#1 | 75.91(8)   | O(17)-Sr(2)-O(6)     | 133.19(9)  |
| O(2)-Sr(1)-O(15)    | 90.64(9)   | O(20B)-Sr(2)-O(6)    | 83.5(4)    |

|                       |            |                     |            |
|-----------------------|------------|---------------------|------------|
| O(16)-Sr(1)-O(15)     | 72.28(12)  | O(7)#4-Sr(2)-O(6)   | 125.10(7)  |
| O(14)-Sr(1)-O(15)     | 137.12(11) | O(18)-Sr(2)-O(6)    | 129.81(9)  |
| O(13)-Sr(1)-O(15)     | 148.00(11) | O(20)-Sr(2)-O(6)    | 102.90(13) |
| O(11)#1-Sr(1)-O(15)   | 72.86(10)  | O(5)-Sr(2)-O(6)     | 48.75(5)   |
| O(2)-Sr(1)-O(12)#2    | 150.20(7)  | O(10)#1-Sr(2)-O(6)  | 67.49(6)   |
| O(16)-Sr(1)-O(12)#2   | 72.97(9)   | O(17)-Sr(2)-O(19)   | 66.53(10)  |
| O(14)-Sr(1)-O(12)#2   | 77.04(7)   | O(20B)-Sr(2)-O(19)  | 75.8(3)    |
| O(13)-Sr(1)-O(12)#2   | 70.46(7)   | O(7)#4-Sr(2)-O(19)  | 125.30(9)  |
| O(11)#1-Sr(1)-O(12)#2 | 112.97(6)  | O(18)-Sr(2)-O(19)   | 142.03(10) |
| O(15)-Sr(1)-O(12)#2   | 116.08(8)  | O(20)-Sr(2)-O(19)   | 71.50(13)  |
| O(2)-Sr(1)-O(11)#2    | 160.35(6)  | O(5)-Sr(2)-O(19)    | 68.30(8)   |
| O(16)-Sr(1)-O(11)#2   | 84.03(8)   | O(10)#1-Sr(2)-O(19) | 136.75(8)  |
| O(14)-Sr(1)-O(11)#2   | 125.40(7)  | O(6)-Sr(2)-O(19)    | 69.28(8)   |
| O(13)-Sr(1)-O(11)#2   | 90.18(9)   | O(5)-Ni(1)-N(1)     | 92.62(8)   |
| O(11)#1-Sr(1)-O(11)#2 | 76.15(7)   | O(5)-Ni(1)-O(1)     | 95.95(8)   |
| O(15)-Sr(1)-O(11)#2   | 75.83(9)   | N(1)-Ni(1)-O(1)     | 79.40(8)   |
| O(12)#2-Sr(1)-O(11)#2 | 48.65(6)   | O(5)-Ni(1)-N(3)     | 169.54(8)  |
| O(17)-Sr(2)-O(20B)    | 99.8(4)    | N(1)-Ni(1)-N(3)     | 93.17(9)   |
| O(17)-Sr(2)-O(7)#4    | 72.64(8)   | O(1)-Ni(1)-N(3)     | 93.68(8)   |
| O(20B)-Sr(2)-O(7)#4   | 147.6(3)   | O(5)-Ni(1)-O(9)     | 91.03(7)   |
| O(17)-Sr(2)-O(18)     | 95.34(12)  | N(1)-Ni(1)-O(9)     | 94.47(8)   |
| O(20B)-Sr(2)-O(18)    | 74.9(3)    | O(1)-Ni(1)-O(9)     | 170.89(8)  |
| O(7)#4-Sr(2)-O(18)    | 74.52(8)   | N(3)-Ni(1)-O(9)     | 79.83(8)   |
| O(17)-Sr(2)-O(20)     | 77.12(17)  | O(5)-Ni(1)-N(2)     | 79.19(8)   |
| O(20B)-Sr(2)-O(20)    | 23.4(3)    | N(1)-Ni(1)-N(2)     | 171.49(9)  |
| O(7)#4-Sr(2)-O(20)    | 131.88(13) | O(1)-Ni(1)-N(2)     | 98.98(8)   |
| O(18)-Sr(2)-O(20)     | 72.01(12)  | N(3)-Ni(1)-N(2)     | 95.27(8)   |
| O(17)-Sr(2)-O(5)      | 99.59(10)  | O(9)-Ni(1)-N(2)     | 88.06(8)   |
| O(20B)-Sr(2)-O(5)     | 127.4(3)   | Ni(1)-O(5)-Sr(2)    | 146.29(9)  |
| Sr(1)#6-O(11)-Sr(1)#2 | 103.85(7)  |                     |            |

Symmetry transformations used to generate equivalent atoms:  
 #1 x-1,y,z; #2 -x+1,-y,-z+1; #3 -x,-y,-z+1; #4 x-1/2,-y+1/2,z+1/2; #5 x+1/2,-y+1/2,z-1/2;  
 #6 x+1,y,z.

**Table S12** Hydrogen bonds for complex **6** [Å and °]

| D-H...A                  | d(D-H)    | d(H...A)  | d(D...A)  | <(DHA)    |
|--------------------------|-----------|-----------|-----------|-----------|
| O(13)-H(13A)...O(21)     | 0.860(10) | 1.831(13) | 2.686(4)  | 172(4)    |
| O(13)-H(13B)...O(14)#2   | 0.857(10) | 2.43(3)   | 3.091(4)  | 135(3)    |
| O(14)-H(14A)...O(12)     | 0.85      | 1.93      | 2.773(3)  | 171.7     |
| O(14)-H(14B)...O(6)#7    | 0.85      | 1.91      | 2.761(3)  | 176.5     |
| O(15)-H(15A)...O(6)#4    | 0.85      | 2.58      | 3.295(3)  | 142.9     |
| O(15)-H(15B)...O(13)#3   | 0.85      | 2.15      | 2.993(5)  | 172.2     |
| O(16)-H(16A)...O(10)#4   | 0.842(10) | 1.97(3)   | 2.717(3)  | 147(5)    |
| O(16)-H(16B)...O(22)#8   | 0.841(10) | 2.223(13) | 3.043(5)  | 165(4)    |
| O(17)-H(17A)...O(4)#9    | 0.854(10) | 1.884(10) | 2.733(3)  | 172(2)    |
| O(17)-H(17B)...O(8)#4    | 0.860(10) | 1.938(16) | 2.730(4)  | 153(3)    |
| O(18)-H(18A)...O(4)#1    | 0.839(10) | 2.007(10) | 2.791(3)  | 155.0(19) |
| O(18)-H(18B)...O(22)#10  | 0.842(10) | 2.117(18) | 2.881(5)  | 151(3)    |
| O(19)-H(19A)...O(9)      | 0.851(10) | 2.52(3)   | 3.239(4)  | 143(4)    |
| O(19)-H(19B)...O(3)#9    | 0.850(10) | 2.117(13) | 2.960(4)  | 172(5)    |
| O(20)-H(20B)...O(8)#11   | 0.848(10) | 2.083(19) | 2.914(6)  | 167(6)    |
| O(20)-H(20A)...O(21)#11  | 0.846(10) | 1.96(2)   | 2.779(5)  | 163(6)    |
| O(20)-H(20B)...O(8)#11   | 0.848(10) | 2.083(19) | 2.914(6)  | 167(6)    |
| O(20B)-H(20C)...O(21)#11 | 0.849(10) | 2.11(3)   | 2.929(11) | 161(8)    |
| O(20B)-H(20D)...O(22)#10 | 0.851(10) | 1.93(7)   | 2.699(11) | 149(13)   |
| O(21)-H(21A)...O(1)      | 0.851(10) | 1.942(11) | 2.784(3)  | 170(4)    |
| O(21)-H(21B)...O(3)#12   | 0.857(10) | 1.884(16) | 2.700(4)  | 159(4)    |
| O(22)-H(22A)...O(3)      | 0.85      | 1.93      | 2.692(4)  | 149.2     |
| O(22)-H(22B)...O(8)#4    | 0.85      | 2.23      | 2.982(6)  | 147.7     |
| C(19)-H(19)...O(12)      | 0.93      | 2.46      | 2.783(3)  | 100.3     |



|                                                                                                                                                                                                                                                                                                                 |      |      |          |       |
|-----------------------------------------------------------------------------------------------------------------------------------------------------------------------------------------------------------------------------------------------------------------------------------------------------------------|------|------|----------|-------|
| C(17)-H(17)...O(1)#6                                                                                                                                                                                                                                                                                            | 0.93 | 2.52 | 3.199(3) | 130.4 |
| Symmetry transformations used to generate equivalent atoms:<br>#1 x-1,y,z; #2 -x+1,-y,-z+1; #3 -x,-y,-z+1; #4 x-1/2,-y+1/2,z+1/2; #5 x+1/2,-y+1/2,z-1/2;<br>#6 x+1,y,z; #7 x+1/2,-y+1/2,z+1/2; #8 -x+1/2,y-1/2,-z+3/2; #9 -x+1,-y+1,-z+1;<br>#10 -x,-y+1,-z+1; #11 -x+1/2,y+1/2,-z+1/2; #12 x-1/2,-y+1/2,z-1/2. |      |      |          |       |

**Table S13** Selected bond lengths [Å] and angle [°] for complex 7

|                                                                                                                                                                                                 |            |                    |            |
|-------------------------------------------------------------------------------------------------------------------------------------------------------------------------------------------------|------------|--------------------|------------|
| Zn(1)-O(7)#1                                                                                                                                                                                    | 1.996(3)   | Sr(1)-O(2)#3       | 2.573(3)   |
| Zn(1)-O(1)                                                                                                                                                                                      | 2.031(3)   | Sr(1)-O(8)#4       | 2.573(3)   |
| Zn(1)-N(1)                                                                                                                                                                                      | 2.036(3)   | Sr(1)-O(12)        | 2.657(5)   |
| Zn(1)-O(5)                                                                                                                                                                                      | 2.043(3)   | Sr(1)-O(10)        | 2.675(4)   |
| Zn(1)-N(2)                                                                                                                                                                                      | 2.081(3)   | Sr(1)-O(13)        | 2.686(4)   |
| Sr(1)-O(4)                                                                                                                                                                                      | 2.561(3)   | Sr(1)-O(9)         | 2.804(4)   |
| Sr(1)-O(6)#2                                                                                                                                                                                    | 2.564(3)   | Sr(1)-O(11)        | 2.812(5)   |
| O(7)#1-Zn(1)-O(1)                                                                                                                                                                               | 107.09(12) | O(6)#2-Sr(1)-O(10) | 72.96(11)  |
| O(7)#1-Zn(1)-N(1)                                                                                                                                                                               | 104.79(12) | O(2)#3-Sr(1)-O(10) | 125.91(12) |
| O(1)-Zn(1)-N(1)                                                                                                                                                                                 | 80.81(11)  | O(8)#4-Sr(1)-O(10) | 70.19(11)  |
| O(7)#1-Zn(1)-O(5)                                                                                                                                                                               | 96.86(12)  | O(12)-Sr(1)-O(10)  | 108.06(16) |
| O(1)-Zn(1)-O(5)                                                                                                                                                                                 | 156.01(12) | O(4)-Sr(1)-O(13)   | 85.30(11)  |
| N(1)-Zn(1)-O(5)                                                                                                                                                                                 | 94.47(11)  | O(6)#2-Sr(1)-O(13) | 136.01(11) |
| O(7)#1-Zn(1)-N(2)                                                                                                                                                                               | 99.07(11)  | O(2)#3-Sr(1)-O(13) | 87.74(10)  |
| O(1)-Zn(1)-N(2)                                                                                                                                                                                 | 94.66(12)  | O(8)#4-Sr(1)-O(13) | 74.19(10)  |
| N(1)-Zn(1)-N(2)                                                                                                                                                                                 | 156.01(12) | O(12)-Sr(1)-O(13)  | 66.75(14)  |
| O(5)-Zn(1)-N(2)                                                                                                                                                                                 | 80.08(11)  | O(10)-Sr(1)-O(13)  | 143.53(12) |
| O(4)-Sr(1)-O(6)#2                                                                                                                                                                               | 79.74(10)  | O(4)-Sr(1)-O(9)    | 71.37(10)  |
| O(4)-Sr(1)-O(2)#3                                                                                                                                                                               | 136.59(9)  | O(6)#2-Sr(1)-O(9)  | 74.73(10)  |
| O(6)#2-Sr(1)-O(2)#3                                                                                                                                                                             | 76.04(10)  | O(2)#3-Sr(1)-O(9)  | 67.79(10)  |
| O(4)-Sr(1)-O(8)#4                                                                                                                                                                               | 75.69(11)  | O(8)#4-Sr(1)-O(9)  | 125.64(11) |
| O(6)#2-Sr(1)-O(8)#4                                                                                                                                                                             | 138.82(9)  | O(12)-Sr(1)-O(9)   | 112.77(13) |
| O(2)#3-Sr(1)-O(8)#4                                                                                                                                                                             | 142.24(11) | O(10)-Sr(1)-O(9)   | 139.07(14) |
| O(4)-Sr(1)-O(12)                                                                                                                                                                                | 141.60(11) | O(13)-Sr(1)-O(9)   | 61.29(12)  |
| O(6)#2-Sr(1)-O(12)                                                                                                                                                                              | 138.66(11) | O(4)-Sr(1)-O(11)   | 139.15(12) |
| O(2)#3-Sr(1)-O(12)                                                                                                                                                                              | 70.64(11)  | O(6)#2-Sr(1)-O(11) | 83.99(12)  |
| O(8)#4-Sr(1)-O(12)                                                                                                                                                                              | 71.78(12)  | O(2)#3-Sr(1)-O(11) | 73.01(11)  |
| O(4)-Sr(1)-O(10)                                                                                                                                                                                | 78.70(14)  | O(8)#4-Sr(1)-O(11) | 93.49(12)  |
| O(13)-Sr(1)-O(11)                                                                                                                                                                               | 130.15(15) | O(12)-Sr(1)-O(11)  | 63.53(15)  |
| O(9)-Sr(1)-O(11)                                                                                                                                                                                | 138.74(11) | O(10)-Sr(1)-O(11)  | 60.70(16)  |
| Symmetry transformations used to generate equivalent atoms:<br>#1 -x-1,-y+1,-z; #2 -x+1/2,y-1/2,-z+1/2; #3 x+1/2,-y+1/2,z+1/2; #4 -x,-y+1,-z;<br>#5 x-1/2,-y+1/2,z-1/2; #6 -x+1/2,y+1/2,-z+1/2. |            |                    |            |

**Table S14** Hydrogen bonds for complex 7 [Å and °]

| D-H...A                                                                                                                                                                                                                                                                       | d(D-H) | d(H...A) | d(D...A) | <(DHA) |
|-------------------------------------------------------------------------------------------------------------------------------------------------------------------------------------------------------------------------------------------------------------------------------|--------|----------|----------|--------|
| O(9)-H(9A)...O(12)#2                                                                                                                                                                                                                                                          | 0.85   | 2.31     | 2.819(6) | 119.2  |
| O(9)-H(9B)...O(1)#3                                                                                                                                                                                                                                                           | 0.85   | 2.04     | 2.812(5) | 151.3  |
| O(10)-H(10B)...O(7)#4                                                                                                                                                                                                                                                         | 0.85   | 2.01     | 2.845(5) | 165.5  |
| O(10)-H(10B)...O(8)#4                                                                                                                                                                                                                                                         | 0.85   | 2.58     | 3.019(5) | 113.2  |
| O(10)-H(10A)...O(12)#7                                                                                                                                                                                                                                                        | 0.85   | 2.14     | 2.843(6) | 139.3  |
| O(11)-H(11A)...O(3)#8                                                                                                                                                                                                                                                         | 0.85   | 1.98     | 2.818(6) | 170.3  |
| O(11)-H(11B)...O(6)#9                                                                                                                                                                                                                                                         | 0.85   | 2.42     | 3.227(6) | 157.6  |
| O(13)-H(13A)...O(5)                                                                                                                                                                                                                                                           | 0.85   | 2.05     | 2.880(5) | 163.9  |
| O(13)-H(13B)...O(4)#6                                                                                                                                                                                                                                                         | 0.85   | 2.03     | 2.858(5) | 166.0  |
| C(9)-H(9)...O(11)#6                                                                                                                                                                                                                                                           | 0.93   | 2.55     | 3.434(6) | 159.8  |
| C(5)-H(5)...O(4)                                                                                                                                                                                                                                                              | 0.93   | 2.46     | 2.777(5) | 99.9   |
| C(10)-H(10)...O(3)#10                                                                                                                                                                                                                                                         | 0.93   | 2.42     | 3.140(5) | 134.5  |
| Symmetry transformations used to generate equivalent atoms:<br>#1 -x-1,-y+1,-z; #2 -x+1/2,y-1/2,-z+1/2; #3 x+1/2,-y+1/2,z+1/2; #4 -x,-y+1,-z;<br>#5 x-1/2,-y+1/2,z-1/2; #6 -x+1/2,y+1/2,-z+1/2; #7 -x+3/2,y-1/2,-z+1/2;<br>#8 -x+3/2,y+1/2,-z+1/2; #9 x+1,y,z; #10 x-1,y+1,z. |        |          |          |        |



**Table S15** Selected bond lengths [Å] and angle [°] for complex **8**

|                      |           |                     |            |
|----------------------|-----------|---------------------|------------|
| Sr(1)-O(13')         | 2.504(6)  | Sr(2)-O(21)         | 2.615(2)   |
| Sr(1)-O(13)          | 2.503(7)  | Sr(2)-O(8)#2        | 2.631(2)   |
| Sr(1)-O(3)           | 2.510(2)  | Sr(2)-O(19)         | 2.634(3)   |
| Sr(1)-O(10)#1        | 2.550(2)  | Sr(2)-O(17)         | 2.697(2)   |
| Sr(1)-O(14)          | 2.647(3)  | Sr(2)-O(18)         | 2.709(2)   |
| Sr(1)-O(15)          | 2.653(2)  | Sr(2)-O(16)         | 2.796(2)   |
| Sr(1)-O(17)          | 2.658(2)  | Sr(2)-O(7)#2        | 2.808(2)   |
| Sr(1)-O(16)          | 2.664(2)  | N(2)-Zn(1)          | 2.168(3)   |
| Sr(1)-O(18)          | 2.743(2)  | N(3)-Zn(1)          | 2.171(3)   |
| N(1)-C(1)            | 1.340(4)  | Zn(1)-O(5)          | 2.088(2)   |
| N(1)-C(5)            | 1.341(4)  | Zn(1)-O(9)          | 2.115(2)   |
| N(1)-Zn(1)           | 2.186(2)  | O(7)-Sr(2)#3        | 2.808(2)   |
| O(1)-Zn(1)           | 2.079(2)  | O(8)-Sr(2)#3        | 2.631(2)   |
| Sr(2)-O(20)          | 2.554(2)  | O(10)-Sr(1)#4       | 2.550(2)   |
| Sr(2)-O(22)          | 2.608(2)  |                     |            |
| O(13')-Sr(1)-O(13)   | 12.5(4)   | O(21)-Sr(2)-O(8)#2  | 75.93(7)   |
| O(13')-Sr(1)-O(3)    | 90.7(3)   | O(20)-Sr(2)-O(19)   | 77.45(9)   |
| O(13)-Sr(1)-O(3)     | 78.2(3)   | O(22)-Sr(2)-O(19)   | 139.64(9)  |
| O(13')-Sr(1)-O(10)#1 | 74.0(5)   | O(21)-Sr(2)-O(19)   | 73.44(8)   |
| O(13)-Sr(1)-O(10)#1  | 75.2(5)   | O(8)#2-Sr(2)-O(19)  | 119.07(8)  |
| O(3)-Sr(1)-O(10)#1   | 86.02(8)  | O(20)-Sr(2)-O(17)   | 141.27(8)  |
| O(13')-Sr(1)-O(14)   | 73.0(4)   | O(22)-Sr(2)-O(17)   | 116.18(7)  |
| O(13)-Sr(1)-O(14)    | 82.8(4)   | O(21)-Sr(2)-O(17)   | 142.67(7)  |
| O(3)-Sr(1)-O(14)     | 144.37(8) | O(8)#2-Sr(2)-O(17)  | 73.19(7)   |
| O(10)#1-Sr(1)-O(14)  | 117.85(8) | O(19)-Sr(2)-O(17)   | 104.17(8)  |
| O(13')-Sr(1)-O(15)   | 76.4(4)   | O(20)-Sr(2)-O(18)   | 79.65(8)   |
| O(13)-Sr(1)-O(15)    | 72.4(4)   | O(22)-Sr(2)-O(18)   | 127.38(7)  |
| O(3)-Sr(1)-O(15)     | 78.04(8)  | O(21)-Sr(2)-O(18)   | 139.19(7)  |
| O(10)#1-Sr(1)-O(15)  | 146.11(9) | O(8)#2-Sr(2)-O(18)  | 138.53(7)  |
| O(14)-Sr(1)-O(15)    | 67.53(8)  | O(19)-Sr(2)-O(18)   | 69.80(7)   |
| O(13')-Sr(1)-O(17)   | 148.7(5)  | O(17)-Sr(2)-O(18)   | 65.51(7)   |
| O(13)-Sr(1)-O(17)    | 147.9(4)  | O(20)-Sr(2)-O(16)   | 82.19(8)   |
| O(3)-Sr(1)-O(17)     | 96.98(8)  | O(22)-Sr(2)-O(16)   | 69.18(7)   |
| O(10)#1-Sr(1)-O(17)  | 136.56(7) | O(21)-Sr(2)-O(16)   | 141.40(7)  |
| O(14)-Sr(1)-O(17)    | 83.49(9)  | O(8)#2-Sr(2)-O(16)  | 104.36(7)  |
| O(15)-Sr(1)-O(17)    | 75.61(8)  | O(19)-Sr(2)-O(16)   | 131.76(8)  |
| O(13')-Sr(1)-O(16)   | 121.1(2)  | O(17)-Sr(2)-O(16)   | 67.90(6)   |
| O(13)-Sr(1)-O(16)    | 132.7(2)  | O(18)-Sr(2)-O(16)   | 63.73(6)   |
| O(3)-Sr(1)-O(16)     | 138.31(8) | O(20)-Sr(2)-O(7)#2  | 140.30(8)  |
| O(10)#1-Sr(1)-O(16)  | 78.76(7)  | O(22)-Sr(2)-O(7)#2  | 117.49(7)  |
| O(14)-Sr(1)-O(16)    | 75.47(8)  | O(21)-Sr(2)-O(7)#2  | 71.18(7)   |
| O(15)-Sr(1)-O(16)    | 131.82(8) | O(8)#2-Sr(2)-O(7)#2 | 47.75(7)   |
| O(17)-Sr(1)-O(16)    | 70.42(7)  | O(19)-Sr(2)-O(7)#2  | 72.76(8)   |
| O(13')-Sr(1)-O(18)   | 145.2(5)  | O(17)-Sr(2)-O(7)#2  | 72.63(7)   |
| O(13)-Sr(1)-O(18)    | 139.2(4)  | O(18)-Sr(2)-O(7)#2  | 112.79(7)  |
| O(3)-Sr(1)-O(18)     | 73.53(8)  | O(16)-Sr(2)-O(7)#2  | 137.48(7)  |
| O(10)#1-Sr(1)-O(18)  | 74.06(7)  | O(1)-Zn(1)-O(5)     | 113.44(10) |
| O(14)-Sr(1)-O(18)    | 135.77(8) | O(1)-Zn(1)-O(9)     | 85.12(9)   |
| O(15)-Sr(1)-O(18)    | 127.64(8) | O(5)-Zn(1)-O(9)     | 157.53(9)  |
| O(17)-Sr(1)-O(18)    | 65.56(6)  | O(1)-Zn(1)-N(2)     | 91.86(9)   |
| O(16)-Sr(1)-O(18)    | 65.04(7)  | O(5)-Zn(1)-N(2)     | 77.69(9)   |
| O(20)-Sr(2)-O(22)    | 71.86(8)  | O(9)-Zn(1)-N(2)     | 89.64(9)   |
| O(20)-Sr(2)-O(21)    | 75.62(8)  | O(1)-Zn(1)-N(3)     | 157.98(9)  |
| O(22)-Sr(2)-O(21)    | 74.02(8)  | O(5)-Zn(1)-N(3)     | 87.44(9)   |
| O(20)-Sr(2)-O(8)#2   | 140.57(8) | O(9)-Zn(1)-N(3)     | 76.38(9)   |
| O(22)-Sr(2)-O(8)#2   | 74.44(7)  | N(2)-Zn(1)-N(3)     | 99.77(10)  |
| O(9)-Zn(1)-N(1)      | 99.51(9)  | O(1)-Zn(1)-N(1)     | 77.17(9)   |

|                                                                                                                                                 |            |                 |          |
|-------------------------------------------------------------------------------------------------------------------------------------------------|------------|-----------------|----------|
| N(2)-Zn(1)-N(1)                                                                                                                                 | 164.95(10) | O(5)-Zn(1)-N(1) | 97.06(9) |
| N(3)-Zn(1)-N(1)                                                                                                                                 | 94.01(10)  |                 |          |
| Symmetry transformations used to generate equivalent atoms:<br>#1 -x,-y-1/2,-z+1/2 #2 -x+1/2,-y+1,z-1/2 #3 -x+1/2,-y+1,z+1/2 #4 -x,y+1/2,-z+1/2 |            |                 |          |

**Table S16** Hydrogen bonds for complex **8** [ $\text{\AA}$  and  $^\circ$ ]

| D-H...A                                                                                                                                                                                                                                                                                       | d(D-H) | d(H...A) | d(D...A) | <(DHA) |
|-----------------------------------------------------------------------------------------------------------------------------------------------------------------------------------------------------------------------------------------------------------------------------------------------|--------|----------|----------|--------|
| O(14)-H(14A)...O(7)#1                                                                                                                                                                                                                                                                         | 0.85   | 2.13     | 2.953(4) | 164.2  |
| O(14)-H(14B)...O(12)#5                                                                                                                                                                                                                                                                        | 0.85   | 2.14     | 2.972(3) | 164.5  |
| O(15)-H(15A)...O(11)#5                                                                                                                                                                                                                                                                        | 0.96   | 1.81     | 2.750(3) | 167.7  |
| O(15)-H(15B)...O(24)#6                                                                                                                                                                                                                                                                        | 0.85   | 2.49     | 3.305(4) | 161.8  |
| O(16)-H(16A)...O(9)#1                                                                                                                                                                                                                                                                         | 0.85   | 1.92     | 2.758(3) | 166.8  |
| O(16)-H(16B)...O(24)                                                                                                                                                                                                                                                                          | 0.85   | 2.05     | 2.877(3) | 165.3  |
| O(17)-H(17A)...O(15)#7                                                                                                                                                                                                                                                                        | 0.85   | 1.92     | 2.764(3) | 169.8  |
| O(17)-H(17B)...O(4)#7                                                                                                                                                                                                                                                                         | 0.85   | 1.84     | 2.687(3) | 177.7  |
| O(18)-H(18A)...O(11)#8                                                                                                                                                                                                                                                                        | 0.85   | 1.94     | 2.762(3) | 161.3  |
| O(18)-H(18B)...O(6)#8                                                                                                                                                                                                                                                                         | 0.85   | 2.00     | 2.805(3) | 156.7  |
| O(19)-H(19A)...O(12)#9                                                                                                                                                                                                                                                                        | 0.85   | 2.08     | 2.912(4) | 164.9  |
| O(19)-H(19B)...O(11)#8                                                                                                                                                                                                                                                                        | 0.85   | 2.36     | 3.111(4) | 148.3  |
| O(19)-H(19B)...O(23)#8                                                                                                                                                                                                                                                                        | 0.85   | 2.53     | 3.118(4) | 127.5  |
| O(20)-H(20A)...O(6)#8                                                                                                                                                                                                                                                                         | 0.85   | 2.01     | 2.793(4) | 153.8  |
| O(20)-H(20B)...O(2)#1                                                                                                                                                                                                                                                                         | 0.85   | 2.02     | 2.870(4) | 173.1  |
| O(21)-H(21A)...O(12)#9                                                                                                                                                                                                                                                                        | 0.85   | 1.90     | 2.741(3) | 172.4  |
| O(21)-H(21B)...O(8)#10                                                                                                                                                                                                                                                                        | 0.85   | 2.03     | 2.774(3) | 145.3  |
| O(22)-H(22A)...O(21)#11                                                                                                                                                                                                                                                                       | 0.85   | 2.08     | 2.852(3) | 150.1  |
| O(22)-H(22B)...O(2)#1                                                                                                                                                                                                                                                                         | 0.85   | 2.21     | 2.921(3) | 141.6  |
| O(23)-H(23A)...O(4)                                                                                                                                                                                                                                                                           | 0.85   | 1.87     | 2.686(4) | 161.5  |
| O(23)-H(23B)...O(8)#12                                                                                                                                                                                                                                                                        | 0.85   | 2.07     | 2.894(4) | 163.5  |
| O(24)-H(24A)...O(23)#7                                                                                                                                                                                                                                                                        | 0.85   | 1.90     | 2.745(4) | 176.7  |
| O(24)-H(24B)...O(7)#1                                                                                                                                                                                                                                                                         | 0.85   | 1.95     | 2.778(4) | 163.7  |
| C(19)-H(19)...O(11)                                                                                                                                                                                                                                                                           | 0.93   | 2.46     | 2.783(4) | 100.1  |
| D-H...A                                                                                                                                                                                                                                                                                       | d(D-H) | d(H...A) | d(D...A) | <(DHA) |
| Symmetry transformations used to generate equivalent atoms:<br>#1 -x,-y-1/2,-z+1/2 #2 -x+1/2,-y+1,z-1/2 #3 -x+1/2,-y+1,z+1/2<br>#4 -x,y+1/2,-z+1/2 #5 x-1/2,-y+3/2,-z #6 -x-1/2,y+1/2,z<br>#7 -x,-y+1,-z #8 -x+1/2,y-1/2,z #9 x,y-1,z<br>#10 x-1/2,y-1,-z+1/2 #11 -x,-y,-z #12 x-1/2,y,-z+1/2 |        |          |          |        |

Varian Resolutions

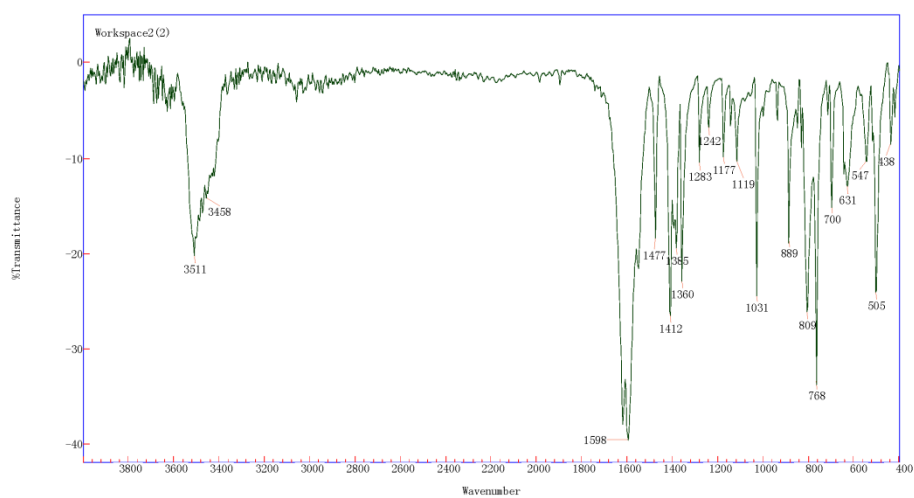

Fig. S1. The IR spectrum of complex 1.

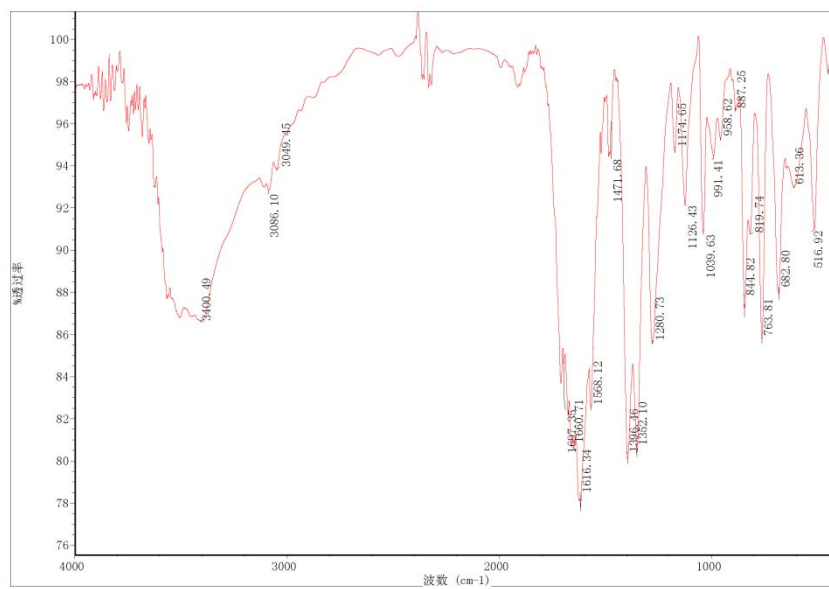

Fig. S2. The IR spectrum of complex 2.

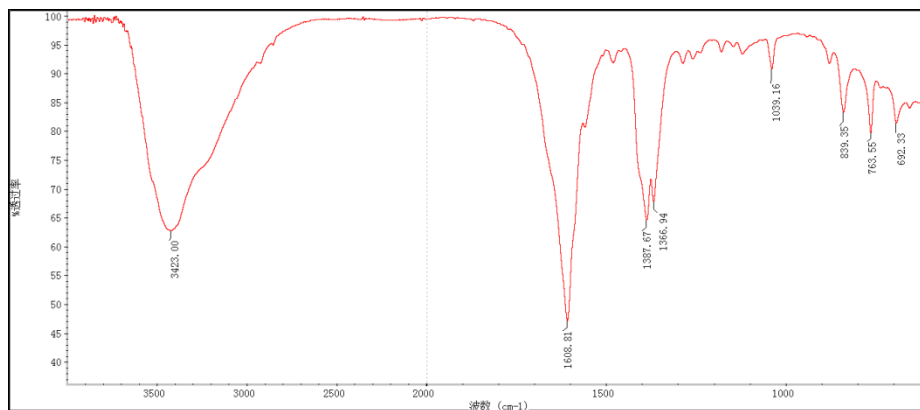

Fig. S3. The IR spectrum of complex 3.

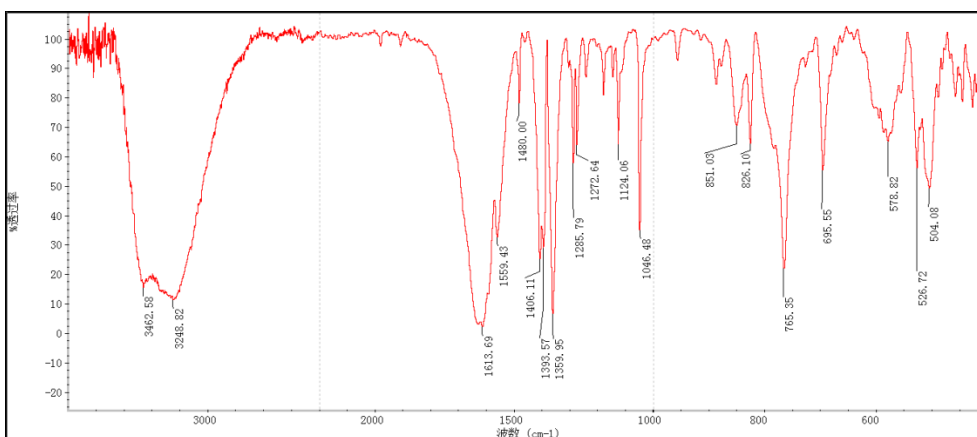

Fig. S4. The IR spectrum of complex 4.

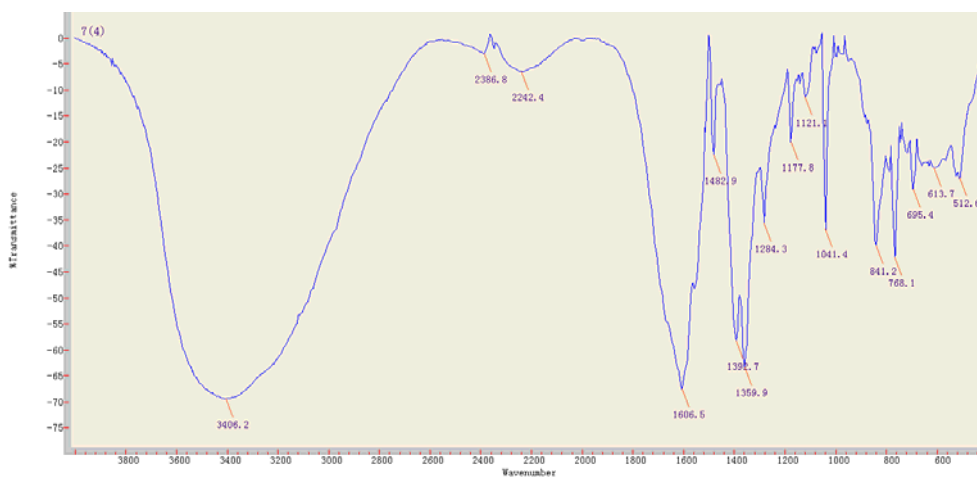

Fig. S5. The IR spectrum of complex 5.

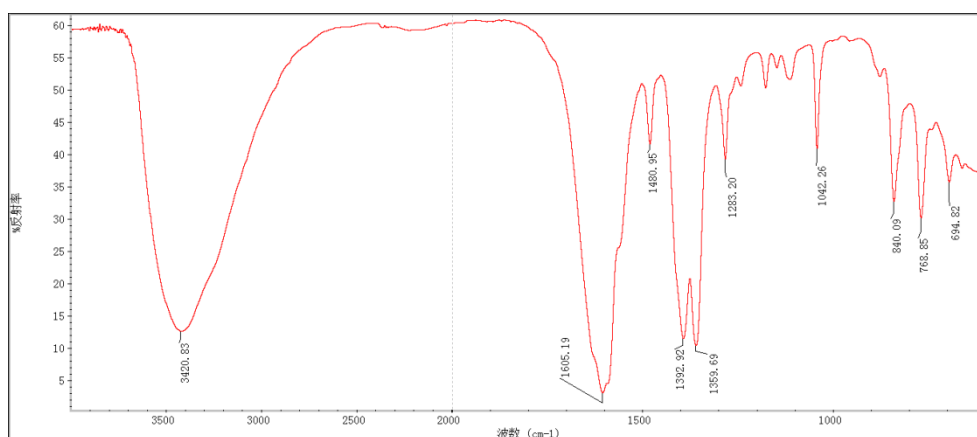

Fig. S6. The IR spectrum of complex 6.

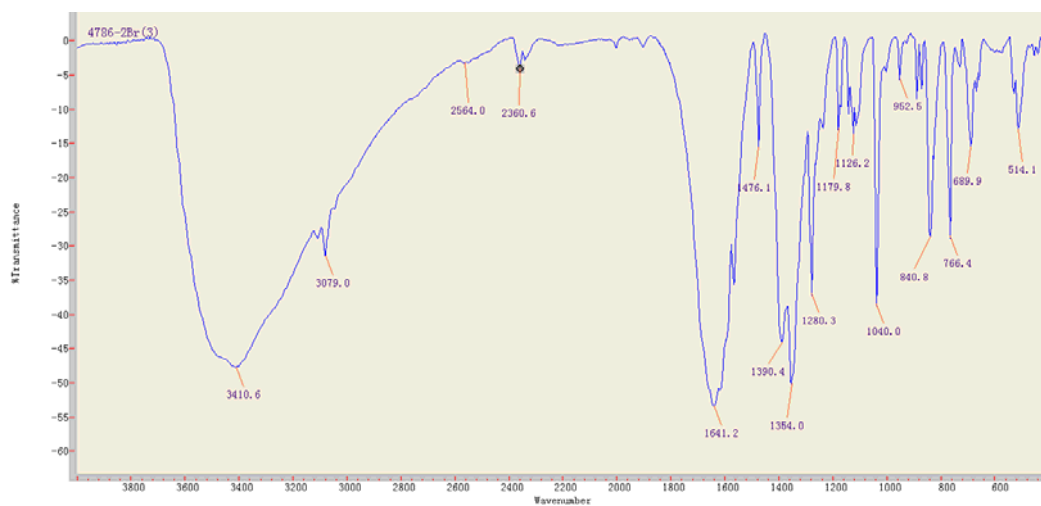

Fig. S7. The IR spectrum of complex 7.

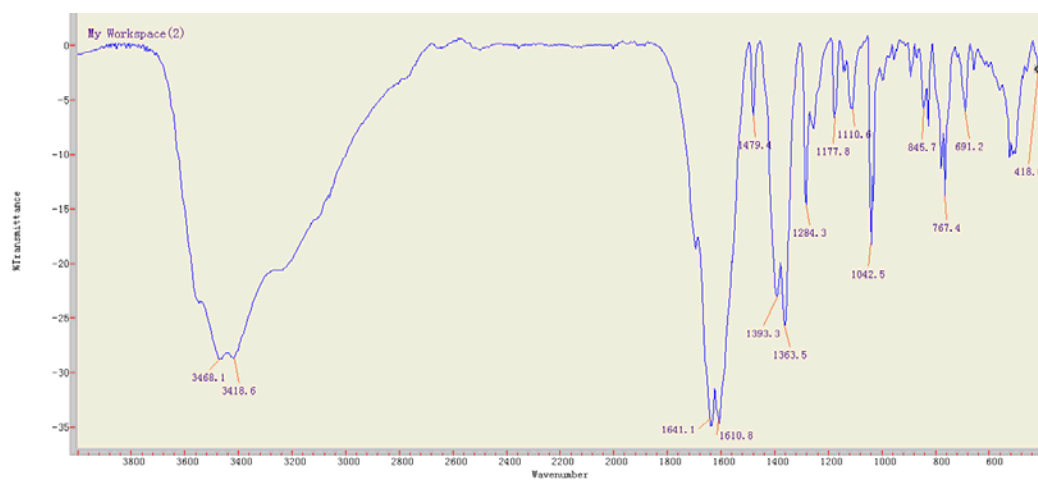

Fig. S8. The IR spectrum of complex 8.

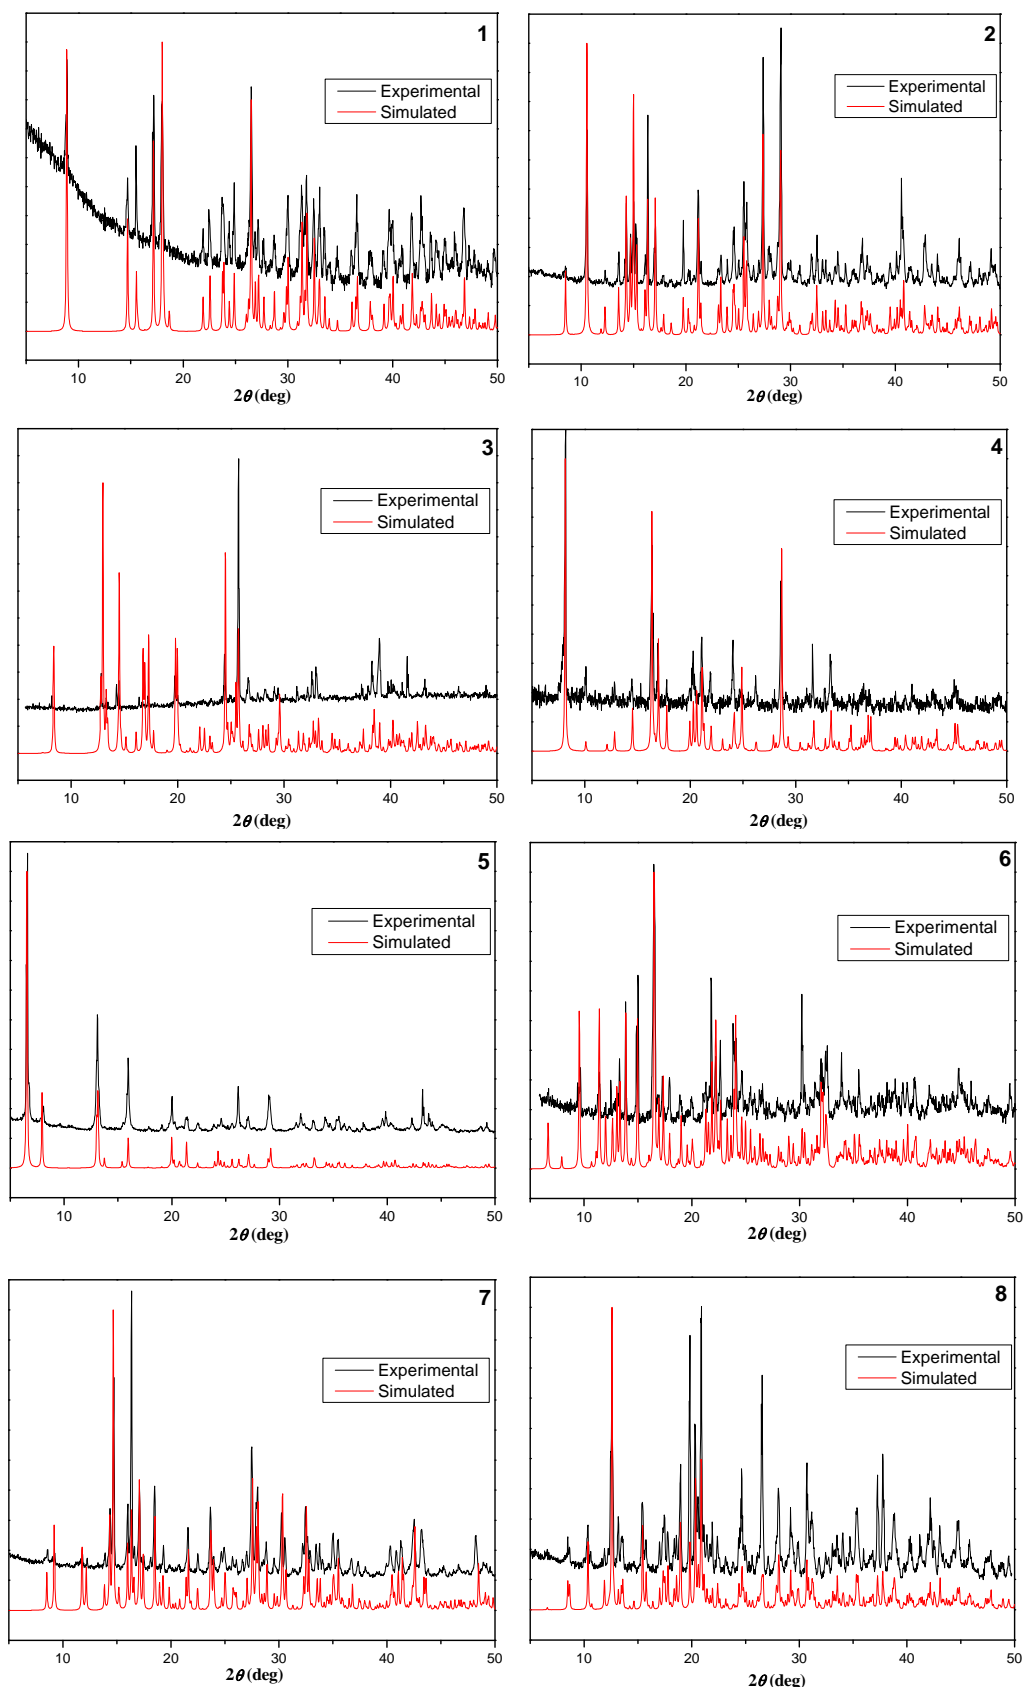

**Fig. S9.** The XRD spectra of complexes 1-8.

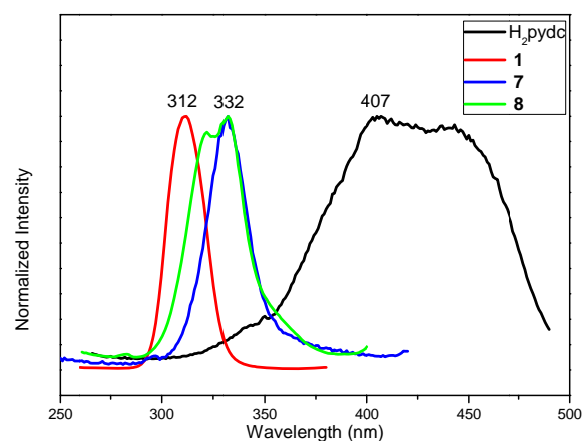

Fig. S10. The excitation spectra of H<sub>2</sub>pydc and complexes **1**, **7** and **8** (Excitation slits = 1nm).

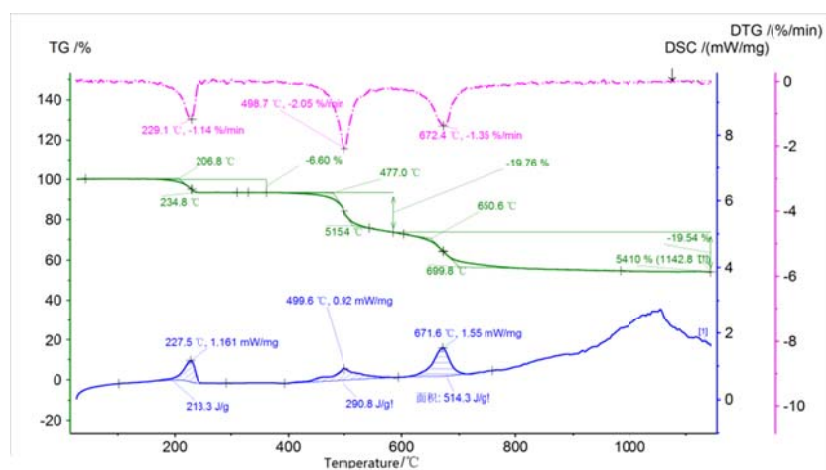

Fig. S11. The TGA curve of complex **1**.

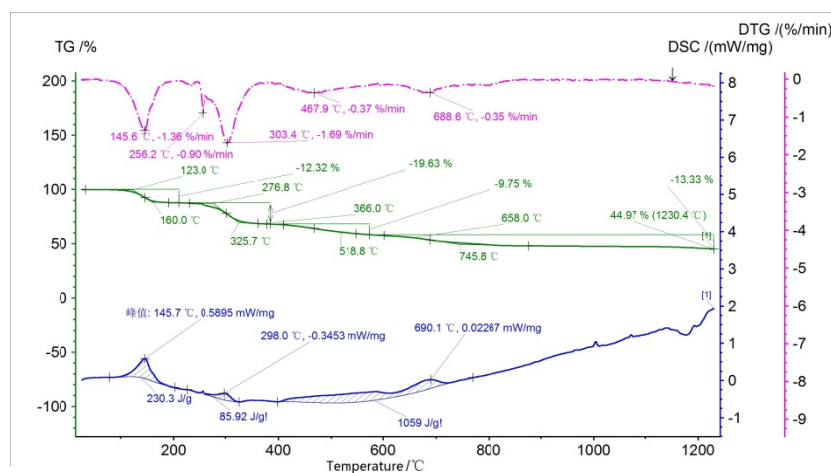

Fig. S12. The TGA curve of complex **2**.



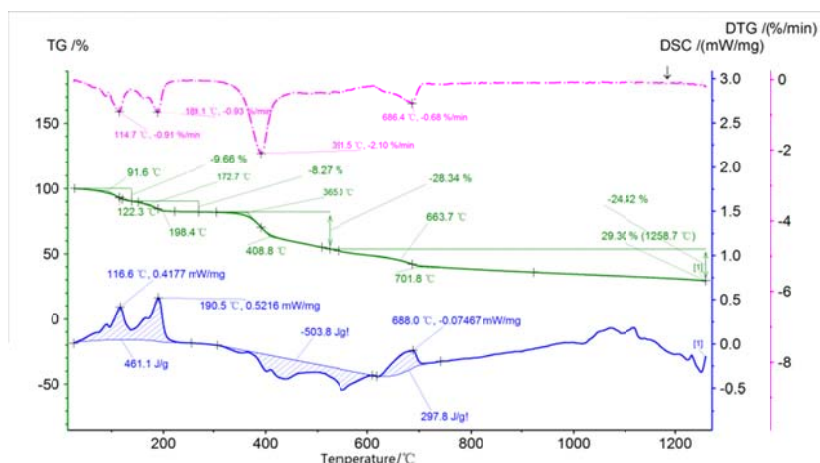

Fig. S13. The TGA curve of complex 3.

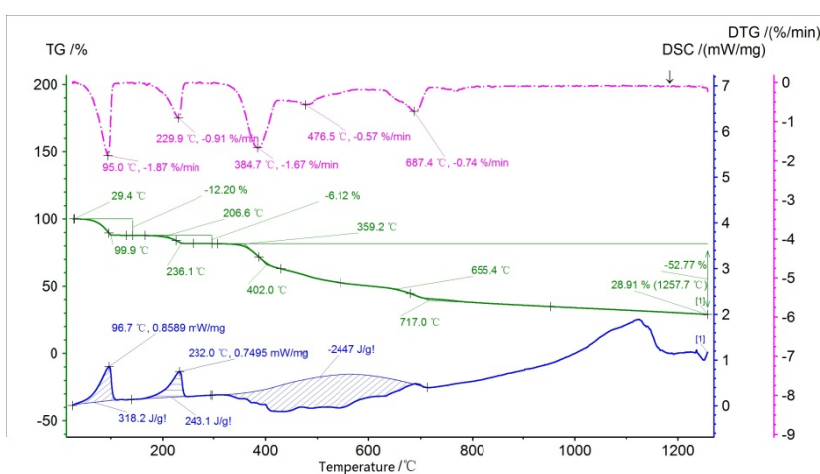

Fig. S14. The TGA curve of complex 4.

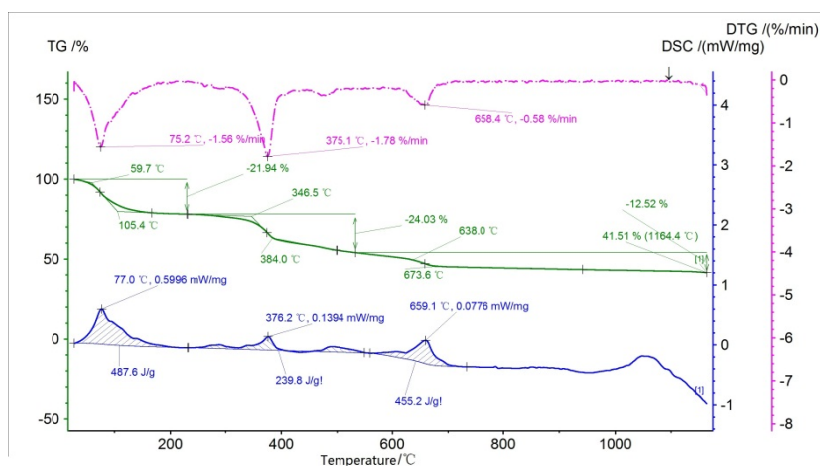

Fig. S15. The TGA curve of complex 5.

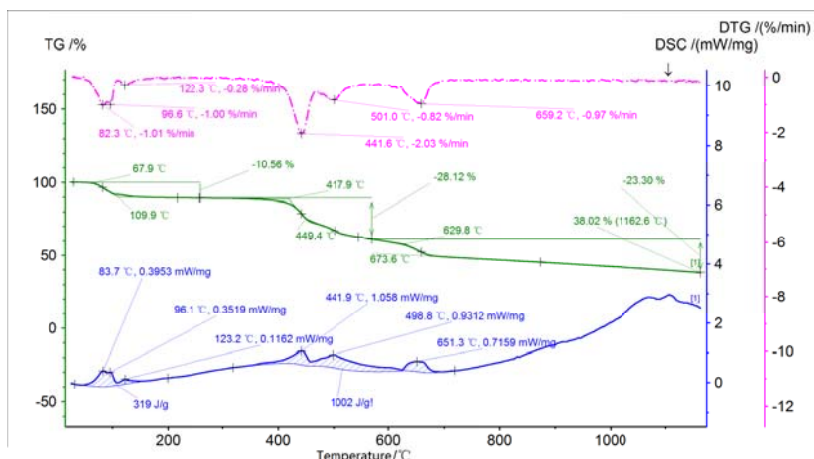

Fig. S16. The TGA curve of complex 6.

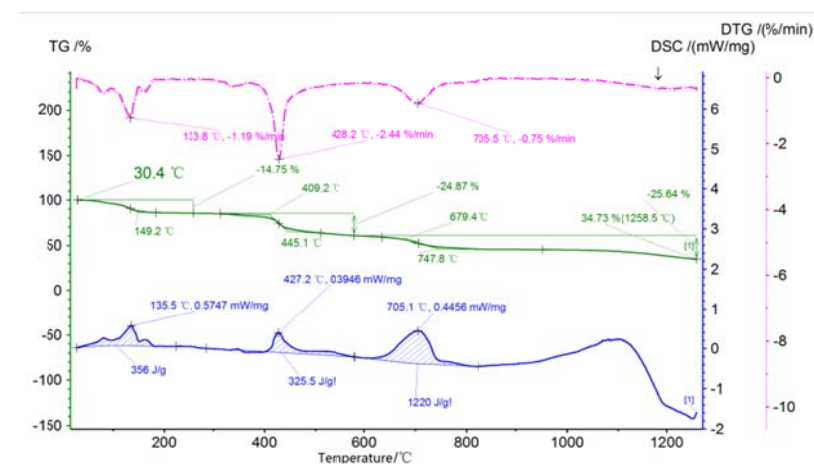

Fig. S17. The TGA curve of complex 7.

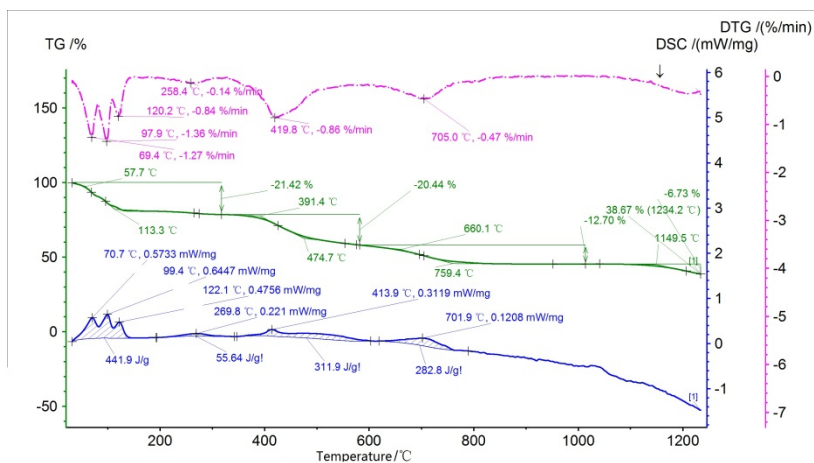

Fig. S18. The TGA curve of complex 8.

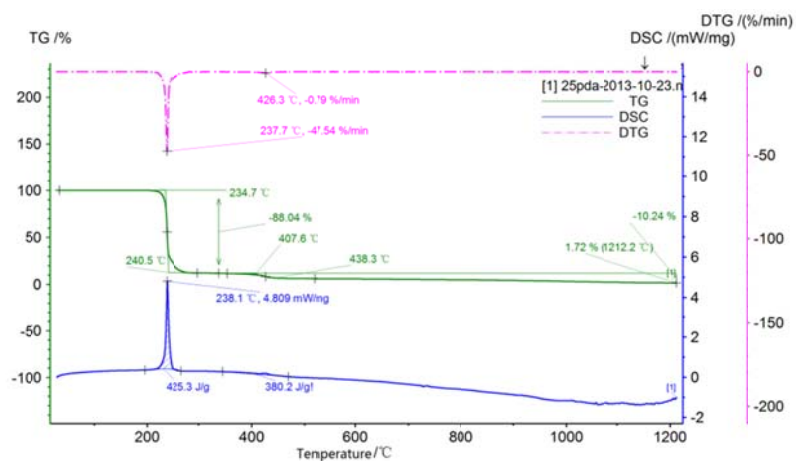

**Fig. S19.** The TGA curve of free H<sub>2</sub>pydc ligand.
